# Supplementary material for: Polyvascular disease, pulse pressure and mortality
Source: Atypon-hosted journal article supplement (doi:10.1024/0301-1526/a001011), 2022-05-23
Supplement: 0301-1526_a001011_esm1.pdf [file 0301-1526_a001011_esm1.pdf]

## Electronic supplementary material

### ESM 1. Comparison of the cardiovascular risk factors in the various vascular beds affected by atherosclerosis

|                                    | <b>PAD</b>      | <b>CS</b>       | <b>CAD</b>     | <b>No</b>              |
|------------------------------------|-----------------|-----------------|----------------|------------------------|
|                                    | <b>N=318</b>    | <b>N=159</b>    | <b>N=2572</b>  | <b>atherosclerosis</b> |
|                                    |                 |                 |                | <b>N=705</b>           |
| Age (years)                        | 65.4(8.77)      | 67.3(8.13)      | 63.8(9.86)     | 58.4 (12.1)            |
| Female sex (%)                     | 18,6            | 20,8            | 25,3           | 48,8                   |
| BMI (kg/m <sup>2</sup> )           | 27.2(4.11)      | 27.2(4)         | 27.5(4.01)     | 27.4 (4.31)            |
| LDL-C (mg/dL)                      | 111(29.6)       | 110(34.2)       | 116(34.8)      | 120 (32.3)             |
| HDL-C (mg/dL)                      | 36(10.6)        | 37(10.3)        | 37.6(10.2)     | 42.8 (11.8)            |
| TG (mg/dL)                         | 164(121-223)    | 153(113-204)    | 150(113-202)   | 133 (97–194)           |
| FGLUC (mg/dL)                      | 109(96.8-141)   | 104(95-127)     | 104(94.6-122)  | 98.8 (91.5–109)        |
| HbA1c (%)                          | 6.82(1.64)      | 6.55(1.43)      | 6.4(1.3)       | 6 (1)                  |
| SBP (mmHg)                         | 149(25.5)       | 148(24.2)       | 143(23.7)      | 136 (22.1)             |
| DBP (mmHg)                         | 80.7(12.2)      | 80.5(11.6)      | 81.2(11.5)     | 80.3 (11.3)            |
| PP (mmHg)                          | 73.4(20.2)      | 72.8(19.7)      | 65.9(18.5)     | 59.2 (17.1)            |
| eGFR (ml/min/1.73 m <sup>2</sup> ) | 75.6(21.2)      | 75.6(22.1)      | 80.6(20.2)     | 86.1 (19.1)            |
| Alcohol intake (g eth/d)           | 2.68(0-24)      | 2.8(0-24)       | 3(0-24)        | 3.36 (0–24)            |
| hsCRP (mg/L)                       | 4.32(2.06-9.98) | 3.95(1.49-7.64) | 3.84(1.5-9.24) | 2.12 (0.98–5.61)       |
| NT-proBNP (pg/mL)                  | 420(152-1610)   | 432(177-1330)   | 333(126-967)   | 157 (70-492)           |
| Hypertension (%)                   | 83,6            | 83              | 75,3           | 62,4                   |
| T1DM (%)                           | 1,89            | 0,629           | 0,35           | 0                      |
| T2DM (%)                           | 55,7            | 43,4            | 43,3           | 26,5                   |
| Current smoker (%)                 | 32,1            | 17              | 24             | 20,4                   |
| Ex-smoker (%)                      | 50              | 57,2            | 44,9           | 27,8                   |
| CAD (%)                            | 94,7            | 93,1            | 100            | 0                      |
| PAD (%)                            | 100             | 34              | 11,7           | 0                      |
| CS (%)                             | 17              | 100             | 5,75           | 0                      |
| 1-vessel CAD (%)                   | 19,7            | 20,4            | 37,2           | 0                      |
| 2-vessel CAD (%)                   | 26,1            | 26,8            | 37,4           | 0                      |
| 3-vessel CAD (%)                   | 53,5            | 54,8            | 38,5           | 0                      |

Notes. PAD: peripheral arterial disease, CS: carotid stenosis, CAD: coronary artery disease.
