# Supplementary material for: Polyvascular disease, pulse pressure and mortality
Source: Atypon-hosted journal article supplement (doi:10.1024/0301-1526/a001011), 2022-05-23
Supplement: 0301-1526_a001011_esm2.pdf [file 0301-1526_a001011_esm2.pdf]

## Electronic supplementary material

### ESM 2. Hazard ratios for patients with different combinations of CAD subgroups with PAD and CS

| Groups                    | All-cause mortality |                   |        | Cardiovascular mortality |                   |        |
|---------------------------|---------------------|-------------------|--------|--------------------------|-------------------|--------|
|                           | N                   | HR (95% CI)       | P      | N                        | HR (95% CI)       | P      |
| 0 = No CAD, no PAD, no CS | 705                 | 1.00              |        | 705                      | 1.00              |        |
| 1 = No CAD, PAD, no CS    | 17                  | 1.40 (0.52–3.79)  | 0.510  | 17                       | 2.48 (0.90–6.82)  | 0.079  |
| 2 = No CAD, no PAD, CS    | 9                   | 1.16 (0.29–4.70)  | 0.836  | 9                        | 1.06 (0.15–7.66)  | 0.954  |
| 3 = No CAD, PAD, CS       | 2                   | 7.53 (1.85–30.72) | 0.005  | 2                        | 6.03 (0.83–43.8)  | 0.076  |
| 4 = 1-CAD, no PAD, no CS  | 875                 | 1.28 (1.01–1.61)  | 0.038  | 872                      | 1.39 (1.02–1.89)  | 0.035  |
| 5 = 1-CAD, PAD, no CS     | 58                  | 2.50 (1.71–3.66)  | <0.001 | 58                       | 2.82 (1.74–4.590) | <0.001 |
| 6 = 1-CAD, no PAD, CS     | 27                  | 1.52 (0.77–3.01)  | 0.228  | 27                       | 1.54 (0.62–3.84)  | 0.358  |
| 7 = 1-CAD, PAD, CS        | 6                   | 6.87 (2.79–16.9)  | <0.001 | 6                        | 7.12 (2.23–22.8)  | 0.001  |
| 8 = 2-CAD, no PAD, no CS  | 534                 | 1.25 (0.97–1.60)  | 0.082  | 533                      | 1.34 (0.96–1.86)  | 0.087  |
| 9 = 2-CAD, PAD, no CS     | 58                  | 2.54 (1.67–3.86)  | <0.001 | 56                       | 2.20 (1.22–3.95)  | 0.008  |
| 10 = 2-CAD, no PAD, CS    | 18                  | 2.21 (1.15–4.25)  | 0.017  | 18                       | 3.64 (1.79–7.40)  | <0.001 |
| 11 = 2-CAD, PAD, CS       | 11                  | 1.52 (0.62–3.75)  | 0.365  | 11                       | 1.50 (0.47–4.83)  | 0.495  |
| 12 = 3-CAD, no PAD, no CS | 766                 | 1.56 (1.24–1.96)  | <0.001 | 759                      | 1.94 (1.44–2.61)  | <0.001 |
| 13 = 3-CAD, PAD, no CS    | 133                 | 3.12 (2.33–4.18)  | <0.001 | 126                      | 3.14 (2.13–4.63)  | <0.001 |
| 14 = 3-CAD, no PAD, CS    | 51                  | 2.08 (1.34–3.23)  | 0.001  | 50                       | 2.53 (1.46–4.37)  | 0.001  |
| 15 = 3-CAD, PAD, CS       | 35                  | 3.08 (1.99–4.75)  | <0.001 | 35                       | 4.20 (2.50–7.04)  | <0.001 |

Notes. PAD: peripheral arterial disease, CS: carotid stenosis, CAD: coronary artery disease.

\*Cox regression, adjusted for age, sex, body mass index, diabetes mellitus and estimated glomerular filtration rate.
